1 **Beta Turn Propensity and Polymer Scaling Exponent Identify Intrinsically Disordered Proteins**  
2 **that Phase Separate**

3  
4  
5  
6 *Elisia A. Paiz,<sup>1</sup> John J. Correia,<sup>2</sup> Nicholas C. Fitzkee,<sup>3</sup> Loren E. Hough,<sup>4,5</sup> and Steven T. Whitten<sup>1\*</sup>*

7  
8  
9 <sup>1</sup> Department of Chemistry and Biochemistry, Texas State University, San Marcos, Texas 78666, United States

10 <sup>2</sup> Department of Cell and Molecular Biology, University of Mississippi Medical Center, Jackson, MS 39211, United  
11 States

12 <sup>3</sup> Department of Chemistry, Mississippi State University, Mississippi State, Mississippi 39762, United States

13 <sup>4</sup> Department of Physics, University of Colorado Boulder, Boulder CO 80309, United States

14 <sup>5</sup> BioFrontiers Institute, University of Colorado Boulder, Boulder CO 80309, United States

15  
16  
17 **Abstract**

18  
19 The complex cellular milieu can spontaneously de-mix in a process driven in part by proteins that are  
20 intrinsically disordered (ID). We hypothesized that protein self-interactions that determine the polymer  
21 scaling exponent,  $\nu$ , of monomeric ID proteins (IDPs), also facilitate de-mixing transitions into phase  
22 separated assemblies. We analyzed a protein database containing subsets that are folded, ID, or IDPs  
23 identified previously to spontaneously phase separate. We found that the subsets differentiated into distinct  
24 protein classes according to sequence-based calculations of  $\nu$  and, surprisingly, the propensity in the  
25 sequence for adopting the  $\beta$ -turn. Structure-based simulations find that transient  $\beta$ -turn structures reduce  
26 the desolvation penalty of forming a protein-rich phase. By this mechanism,  $\beta$ -turns act as energetically  
27 favored nucleation points, which may explain the increased propensity for turns in IDPs that are utilized  
28 biologically for phase separation.

## 1 Introduction

2  
3 Protein liquid-liquid phase separation (LLPS) is increasingly recognized as an important organizing  
4 phenomenon in cells. LLPS is a reversible process whereby complex protein mixtures spontaneously de-  
5 mix into liquid droplets that are enriched in a target protein; concomitantly, surrounding regions are  
6 depleted of that protein (Lee et al., 2013). The de-mixing transition is thought to provide temporal and  
7 spatial control over intracellular interactions by assembling collections of proteins into structures called  
8 membraneless organelles (Mitrea and Kriwacki, 2016), a key step in the regulatory function of P bodies,  
9 the nucleolus, and germ granules (Brady et al., 2017; Elbaum-Garfinkle et al., 2015; Mitrea et al., 2018).  
10 The physical mechanisms responsible for LLPS are not fully understood, but it is known to be facilitated  
11 primarily by proteins that are intrinsically disordered or that contain large intrinsically disordered regions  
12 (Uversky et al., 2015; Chong and Forman-Kay, 2016; Mitrea and Kriwacki, 2016).  
13

14 Among intrinsically disordered regions (IDRs), the hydrodynamic size has been found to vary substantially  
15 with the primary sequence (Marsh and Forman-Kay, 2010; Tomasso et al., 2016). The hydrodynamic  
16 dimensions of the ensembles of disordered structures that exist in solution for biological proteins have been  
17 closely scrutinized (Uversky, 2002; Hofmann et al., 2012; Wuttke et al., 2014; English et al., 2019) and  
18 appears important for the biological function of IDRs. For example, some ID proteins (IDPs) regulate the  
19 remodeling of cellular membranes, and their size controls curvature at membrane surfaces (Snead et al.,  
20 2019; Zeno et al., 2019). With the increased interest in understanding the functional roles of IDPs and IDRs,  
21 the hydrodynamic size has also been used to extract information on the balance of intra- and intermolecular  
22 interactions for a protein and solvent combination (Wilkins et al., 1999; Uversky, 2002; Marsh and Forman-  
23 Kay, 2010). This is achieved by the polymer scaling exponent,  $\nu$ , obtained from the dependence of size  
24 (e.g., hydrodynamic radius,  $R_h$ , or radius of gyration,  $R_g$ ) on polymer length,  $N$ , in the power law relationship  
25  $R_h \propto N^\nu$ . For  $\nu \sim 0.3$ , self-interactions prevail, meaning that protein chains have higher affinity for  
26 themselves than for the solvent (Wilkins et al., 1999). For  $\nu \sim 0.6$ , interactions between chain and solvent  
27 dominate (Kohn et al., 2004). For  $\nu \sim 0.5$ , the self-interactions of the polypeptide and its interactions with  
28 the solvent are net equal, resulting in a *theta* condition (Hofmann et al., 2012) whereby the chain dimensions  
29 depend on polymer properties alone, such as bond angles, lengths, and allowed rotations (Flory, 1949).  
30 Under theta conditions, the structural size of the protein matches expectations from a random walk by an  
31 ideal chain. Overall, however, as  $\nu$  increases, the hydrodynamic dimensions of a protein similarly increase,  
32 and chain contact with the solvent becomes increasingly prominent. Because self-interactions required for  
33 de-mixing could perturb the net balance of intra- and intermolecular interactions for a protein and its  
34 solvent, the polymer scaling exponent likewise could be a predictor of LLPS potential among IDPs.  
35

36 Here, we have tested the hypothesis that the ability of an IDP to phase separate can be detected from its  
37 hydrodynamic dimensions in the monomeric state. We conjecture that the self-interactions that facilitate  
38 the de-mixing transition will manifest in decreased  $R_h$  for IDPs that are competent to phase separate into  
39 protein-rich droplets when compared to IDPs that are not. Based on observations that the presence of ID in  
40 a protein (Meng et al., 2017) and the hydrodynamic size of an IDP (or IDR fragment) are both highly  
41 predictable from the primary sequence (Marsh and Forman-Kay, 2010; English et al., 2019), we show by  
42 analysis of a protein database containing subsets that are folded, ID, or identified previously (Vernon et al.,  
43 2018) to spontaneously phase separate that these three subsets differentiate into distinct protein classes  
44 according to sequence-based calculations of  $\nu$  and, surprisingly, chain propensity for  $\beta$ -turn structures.  
45 Specifically,  $\nu$  calculated from IDRs of proteins that phase separate were lower when compared to other ID  
46 sequences, consistent with our motivating hypothesis, while  $\beta$ -turn propensity was found to increase.  
47

48 To investigate the structural characteristics that possibly underlie a role for the  $\beta$ -turn in facilitating LLPS,  
49 computer simulations of the protein conformational ensemble were used to evaluate the consequences of  
50  $\beta$ -turn enrichment. Simulated ensembles indicate that solvent waters that are associated with disordered  
51 regions are fewer in number when the protein adopts a  $\beta$ -turn, since the tight turn removes backbone

1 hydrogen bonding sites. With fewer attached waters, this predicts a mechanism where transient sampling  
2 of the  $\beta$ -turn can reduce the cost of desolvation that occurs with LLPS (Reichheld et al., 2017), allowing  $\beta$ -  
3 turns to act as energetically favored nucleation points. Using the recently proposed framework of *stickers*  
4 and *spacers* as a molecular model for LLPS (Harmon et al., 2017; Yang et al., 2019; Martin et al., 2020), it  
5 is possible that transient  $\beta$ -turn structures could serve as stickers in the ensemble of otherwise randomly  
6 configured spacers.

## 7 8 9 **Results**

10  
11 **Hydrodynamic Size is Reduced in IDPs that exhibit LLPS (PS IDPs).** We hypothesize that LLPS  
12 potential among IDPs can be predicted from the protein hydrodynamic size. To demonstrate the concept  
13 that protein self-interactions reduce  $R_h$ , and thus also reduce  $\nu$ , **Figure 1** shows mean  $R_h$  that were measured  
14 for folded, chemically denatured, and IDPs (**Fig. 1B**). As expected, since IDPs are unfolded and known to  
15 have relatively few tertiary contacts, IDPs have larger experimental  $R_h$  when compared to folded proteins  
16 of similar  $N$  and, as a group, they have larger  $\nu$ . Moreover, the hydrodynamic dimensions of IDPs are similar  
17 in magnitude to the non-globular and large sizes observed for chemically denatured proteins although the  
18 IDP measurements were performed under native-like conditions.

19  
20 Also included in the figure are sequence predicted  $R_h$  for the ID regions of proteins that have been verified  
21 to exhibit phase separation behavior (Vernon et al., 2018), referred to hereafter as the PS IDP set. ID regions  
22 were predicted from the primary sequences using the GeneSilico MetaDisorder service (Kozlowski and  
23 Bujnicki, 2012). For the identified ID regions,  $R_h$  was then predicted using the net charge and intrinsic chain  
24 propensity for the polyproline II backbone conformation, both known to promote elongated hydrodynamic  
25 dimensions in disordered ensembles (Tomasso et al., 2016; English et al., 2017, 2019). Comparing the IDP  
26 set of experimental  $R_h$  to the set of predicted  $R_h$  from PS IDPs, two observations are immediately apparent.  
27 First, the PS IDP set does indeed exhibit a reduced slope (i.e., smaller  $\nu$ ) in its trend of size versus sequence  
28 length relative to the IDP set. Second, the  $R_h$  variance relative to the  $R_h$  trend line is larger for IDPs than it  
29 is for PS IDPs. This predicts constrained structural properties for the ID regions of proteins that phase  
30 separate, presumably to facilitate de-mixing behavior. Both sets yield trend lines that extrapolate to  
31 essentially identical y-axis intercepts, indicating similar chain flexibility. This intercept gives the pre-factor,  
32  $R_o$ , in the power-law function,  $R_h = R_o \cdot N^\nu$ , and relates to the segmental length of the chain that can be  
33 considered as freely joined (Flory, 1969). Hence, the observed difference in  $\nu$  is not from differences in  
34 average chain stiffness between the two IDP sets, but rather likely due to differences in intra-molecular  
35 interactions between sidechains.

36  
37 A key difference between the two IDP sets is that the non-phase separating protein data uses experimental  
38  $R_h$ , while the PS IDP set uses sequence predicted values. The methods developed to predict  $R_h$  from  
39 sequence for IDPs (Marsh and Forman-Kay, 2010; Tomasso et al., 2016; English et al., 2017) were found  
40 to be accurate when tested (Perez et al., 2014; English et al., 2019), and the IDPs used here consist primarily  
41 of the same IDPs that were used to train the predictions.  $R_h$  for these IDPs are thus accurately predicted  
42 from sequence (**Supplementary Information, Fig. S1**). Comparing sequence-predicted  $R_h$  from both sets,  
43 IDPs to PS IDPs, the same conclusions are drawn. Namely, PS IDPs have, as a group, smaller  $\nu$  and reduced  
44  $R_h$  variance. The identity, sequence, and  $R_h$  (measured or predicted) for each protein in **Figure 1** is provided  
45 in **Supplementary Information, Tables S1-S4**.

46  
47 **Branched Amino Acids are Rare in PS IDPs.** Because the structural dimensions of IDPs are strongly  
48 correlated to sequence composition (Marsh and Forman-Kay, 2010; Tomasso et al., 2016; English et al.,  
49 2017, 2019), the differences in amino acid content of the two IDP sets were evaluated. **Figure 1C** shows  
50 the ratio obtained from the percent composition of each amino acid type in the two protein sets. Ratios  
51 above 1 represent enrichment in PS IDPs, whereas ratios lower than 1 are depletion. Amino acid types that

1 are enriched in PS IDPs were recognized by Forman-Kay and coworkers to have either pi-orbitals among  
2 the side chain groups (F, N, R, and Y) or highly exposed backbone peptide bonds (G and S), which also  
3 have pi-orbitals of bonded  $sp^2$ -hybridized atoms, predicting a role for pi-pi interactions in promoting de-  
4 mixing (Vernon et al., 2018). The same amino acid enrichment is found again in the analysis here. We find  
5 it notable, however, that the branched amino acids, I, L, and V, are the 3 most depleted amino acid types in  
6 PS IDPs when compared to the IDP set. The reduced I, L, and V content seems unrelated to abating the  
7 presence of bulky, hydrophobic side chains, since the aromatic amino acids, F and W, are not similarly  
8 depleted in PS IDPs (Vernon et al., 2018; Martin et al., 2020).

9  
10 To investigate this issue, we compared the scaling exponent,  $\nu$ , calculated individually for each protein to  
11 the combined percent composition of I, L, and V in the protein sequence. **Figure 2A** shows that IDPs and  
12 PS IDPs form separate protein classes according to their dataset averages. The average and standard  
13 deviation obtained from these calculations when applied to the sequences of folded proteins show that I, L,  
14 and V are not uniquely enriched in IDPs. Rather, in the database, I, L, and V are uniquely depleted in PS  
15 IDPs. Also, although the equations that predict  $R_h$  (and thus  $\nu$ ) from sequence were developed for IDPs,  
16 and not designed for use with folded proteins, it was shown recently that reversing the sequence of a  
17 foldable protein can yield an IDP with experimental  $R_h$  that is indeed accurately modeled by the IDP-trained  
18 predictors of hydrodynamic size (English et al., 2018).

19  
20  **$\beta$ -turn Propensity is Increased in PS IDPs.** Because I, L, and V have low intrinsic propensity for being  
21 found in a  $\beta$ -turn, as determined from surveys of stable protein structures (Levitt, 1978), and computer  
22 models have indicated a role for the  $\beta$ -turn in promoting liquid-liquid phase separation (Zhang et al., 2018),  
23 we compared  $\nu$  calculated for the different proteins to the intrinsic chain propensity for forming the  $\beta$ -turn,  
24 again finding that IDPs and PS IDPs are separate protein classes (**Fig. 2B**). Specifically, the PS IDP set has  
25 increased intrinsic chain propensity for the  $\beta$ -turn, more so than both IDPs and folded proteins. Moreover,  
26 the PS IDP set is enriched in amino acid types that favor the  $\beta$ -turn and likewise depleted in amino acids  
27 types that disfavor the  $\beta$ -turn (**Supplementary Information, Fig. S2**).

28  
29 Among the IDPs, A $\beta$ (1-40) has the lowest  $\nu$  and also the lowest  $\beta$ -turn propensity. Easily identified in **Fig.**  
30 **2B**, this protein is the IDP that resides in the figure region that is mostly represented by folded proteins.  
31 Because  $\alpha$ -synuclein is located in this figure where the IDP and folded averages meet (showing  $\nu = 0.548$ ,  
32  $\beta$ -turn propensity = 0.998), it could be that sequences with  $\nu$  that closely match values from folded proteins  
33 have a tendency to form irreversible aggregates, like amyloid, if the sequence is not capable of folding and  
34 also if the  $\beta$ -turn propensity too low. Both A $\beta$ (1-40) and  $\alpha$ -synuclein are amyloid forming proteins (Garzon-  
35 Rodriguez et al., 1997; Li et al., 2018). If the  $\beta$ -turn propensity is high, a low value for  $\nu$  instead indicates  
36 an IDP that is capable of LLPS behavior. Amino acid specific propensities for adopting  $\beta$ -turn structures  
37 from Levitt (Levitt, 1978) that were used to generate **Figures 2** and **S2** are provided in **Supplementary**  
38 **Information, Table S5**.

39  
40  **$\beta$ -turn Structures Reduce Chain Associated Solvent Waters.** We sought to determine the structural  
41 properties of turns that would enable them to form nucleation points in LLPS. An analysis of 1,000 turn  
42 and 1,000 non-turn structures was performed on the sequence GVPGVG (Whitten et al., 2008). For the  
43 structures containing a turn, a hydrogen bond was introduced between the  $H_N$  of V5 and O of V2. This  
44 sequence is derived from elastin-like polypeptide (ELP), a protein sequence known to undergo LLPS  
45 (Zhang et al., 2006; Lyons et al., 2013, 2014) and one where transient  $\beta$ -turns have been implicated in self-  
46 association (Reichheld et al., 2017; Zhang et al., 2018). A variety of structural measurements were taken  
47 on each ensemble, and statistical convergence was confirmed by comparing the average values of the first  
48 500 structures to the average over the entire ensemble, using the standard error of the mean to estimate  
49 uncertainty. Using this approach, all measurements were statistically identical, suggesting that additional  
50 conformations did not alter the measurements beyond the first 500 structures.

51

1 Overall, the structures with  $\beta$ -turns are more compact and have lower accessible surface area and  
2 hydrophobic accessible surface area (**Table 1**). This makes sense because the hydrogen bond restricts the  
3 conformation of turn structures and limits surface exposure. However, because the structures are more  
4 compact,  $\beta$ -turn conformations will also tend to associate with fewer solvent waters. This is demonstrated  
5 by conditional hydrophobic accessible surface area (CHASA), a concept introduced by Fleming and  
6 coworkers (Fleming et al., 2005). In the calculation of CHASA, solvent waters are placed near hydrophilic  
7 groups in the protein based on the positions sampled in long molecular dynamics simulations of peptide  
8 solvation (Fleming et al., 2005). Sterically allowed waters are kept, and these waters are used to model  
9 solvation waters that make hydrogen bonds to the peptide. These additional solvation waters occlude the  
10 hydrophobic accessible surface. The rationale is that all hydrogen bonding groups in a disordered peptide  
11 will be satisfied, either by making hydrogen bonds to the peptide or to solvent waters, and these waters will  
12 alter the hydrophobic surface area.

13  
14 CHASA is also found to be lower in  $\beta$ -turn versus non-turn ensembles (327 vs. 354  $\text{\AA}^2$ ); however, adding  
15 the solvent waters occludes less hydrophobic surface area in the  $\beta$ -turn ensemble, meaning that turn  
16 conformations will on average be associated with fewer waters than non-turns (**Table 1**). This is supported  
17 by the number of sterically accessible waters placed by the CHASA algorithm:  $37.1 \pm 0.1$  waters are  
18 associated with the turn structures, whereas  $44.4 \pm 0.1$  waters are associated with the non-turns. If  
19 hydrophobic interactions are to be made between peptide segments, these solvent-associated waters must  
20 be removed. However, fewer waters must be removed when peptide segments are in  $\beta$ -turn conformations,  
21 which could make turn-turn association more favorable.

22  
23 In addition, the fixed conformations of  $\beta$ -turns expose large contiguous regions of hydrophobic surface area  
24 relative to the random conformations (**Fig. 3**). The CHASA-placed solvation waters in GVPGVG are  
25 clustered when the peptide is in a  $\beta$ -turn conformation (**Fig. 3A**), exposing contiguous segments of  
26 hydrophobic accessible surface area for residues V2 and P3. Representative structures of non-turn  
27 conformations (**Fig. 3B**) do not exhibit these clusters. It is likely that unconstrained, non-turn conformations  
28 present a moving target for chain-chain interactions, making it more difficult for inter- and intra-chain  
29 association to occur. On the other hand, two fixed  $\beta$ -turns can associate and bury a large relative fraction  
30 of hydrophobic accessible surface area (110  $\text{\AA}^2$  per turn; **Fig. 4**).

## 31 32 33 Discussion

34  
35 For flexible chains, the size of the polymer scales with the number of subunits as  $R_h \sim R_o \cdot N^\nu$ . While  $R_o$   
36 is determined by chain stiffness,  $\nu$  is determined primarily by the relative strength of interactions of polymer  
37 subunits with either other subunits or the solvent. When subunit-solvent interactions are more favorable  
38 relative to subunit-subunit interactions, the chain is expanded. We have previously developed an  
39 experimentally based parameterization for predicting the polymer scaling exponent,  $\nu$ , for disordered  
40 proteins based simply on sequence composition. Despite its simplicity, this prediction is remarkably  
41 accurate for a range of disordered proteins (Langridge et al., 2014; Perez et al., 2014; Tomasso et al., 2016;  
42 English et al., 2017; Yarawsky et al., 2017; English et al., 2018, 2019). This parameterization ignores such  
43 affects such as the distribution or clustering of charges (Das and Pappu, 2013), hydrophobic residues  
44 (Krishnan et al., 2008), or the relative spacing of more adhesive groups (i.e., stickers) and more inert groups  
45 (i.e., spacers) (Harmon et al., 2017; Martin et al., 2020). All of those effects will certainly contribute to the  
46 properties of an IDP, including its radius of hydration and propensity to form phase separated droplets.

47  
48 The relative strengths of subunit-solvent and subunit-subunit interactions is a primary determinant of LLPS  
49 of polymers, and so we hypothesized that this simple, ensemble averaged, measure of polymer behavior  
50 would be related to the propensity of IDPs to spontaneously form protein-rich droplets. We queried a list  
51 of disordered proteins curated previously for their potential to phase separate, and shown to have a higher

1 propensity for potential cation-pi interactions (Vernon et al., 2018). We compared those proteins to a list of  
2 proteins whose radius of hydration has been measured in a monomeric state in solution. Note that we cannot  
3 exclude that these control proteins might have the propensity to phase separate under some buffer  
4 conditions, simply that they have not been observed to do so. Remarkably, the PS IDPs naturally separate  
5 from the non-PS IDPs on a plot of predicted (PS IDPs) or measured (non-PS IDPs) radius of hydration as  
6 a function of size (**Fig. 1**). This demonstrates that sequence composition in addition to the particular  
7 patterning of residues is important for determining the protein properties.

8  
9 Next, we sought to determine if the composition of amino acids could reveal potential molecular  
10 mechanisms driving a preference for chain-chain relative to chain-solvent interactions. This mimics the  
11 idea that phase changes are stabilized by modular or multivalent interactions proposed by the Rosen lab (Li  
12 et al., 2012) and extends the idea from the Forman-Kay lab (Vernon et al., 2018) that pi-pi interactions  
13 stabilize coascervates. More recently Martin, et al incorporated this into the stickers and spacers model  
14 proposed by the Pappu lab (Harmon et al., 2017; Yang et al., 2019; Martin et al., 2020) where the interaction  
15 modules can be as small as single amino acids, in their case aromatic residues F and Y. We first analyzed  
16 the relative prevalence of amino acids in each of our groups and found significant depletion of I, L, and V  
17 residues in the PS IDPs as compared to the non-PS IDPs (**Fig. 2**). This is in addition to the depletion of  
18 hydrophobic residues in IDPs in general relative to their folded counterparts (Dunker et al., 2000). This is  
19 consistent with work from Forman-Kay and coworkers highlighting the importance of pi-orbitals in  
20 interactions between amino acids, and thus a preference among hydrophobic amino acids for those residues  
21 that can provide those interactions (Vernon et al., 2018).

22  
23 Our parameterized prediction of  $\nu$  relied on established relationships between the different amino acids and  
24 the common fold motifs. In the sequences we have studied so far, the sequence averaged propensity for  
25 folds ( $\alpha$ -helix,  $\beta$ -turn, etc.) is sufficient to predict the polymer chain size. This dependence on local folding  
26 properties motivated us to consider whether particular fold types are more or less prevalent by prediction  
27 in the PS IDPs than in the non-PS IDPs. The relative depletion of I, L, and V is also consistent with an  
28 increase in  $\beta$ -turn propensity (**Fig. 2**). This finding is consistent with our previous work on the potential for  
29  $\beta$ -turn structures, independent of specific sequence composition, to mediate chain-chain interactions and  
30 drive protein compaction and phase separation (Lyons et al., 2013, 2014). We previously focused on  
31 synthetic ELPs where increasing temperature drove an increase in both  $\beta$ -turn structure and propensity for  
32 phase separation. We hypothesized that that phase separation was favored by  $\beta$ -turn  $\beta$ -turn interactions. To  
33 test this hypothesis in that work, we modeled ELP interactions by generating a series of structural ensembles  
34 that incorporated differing amounts of  $\beta$ -turn bias throughout the chain (Zhang et al., 2018). Ensembles  
35 were then docked into dimer structures where sites of interaction were preferentially  $\beta$ -turns. Consistent  
36 with the hypothesis that  $\beta$ -turn  $\beta$ -turn interactions can be favorable relative to chain-solvent interactions  
37 driving chain compaction and phase separation, we found a strong preference for  $\beta$ -turn propensity  
38 predicted among the PS IDPs relative to the non-PS IDPs and folded proteins (**Fig. 2**).

39  
40 Using the framework of stickers and spacers, it is possible that transient  $\beta$ -turns can serve as stickers in an  
41 ensemble of otherwise random conformations. Even a low population (2-5%) of  $\beta$ -turns (Zhang et al., 2018)  
42 may be sufficient to support self-association. As we have shown above, the partial collapse of a  $\beta$ -turn  
43 lowers the number of waters that must be removed during association, and it primes the backbone in a  
44 conformation that is favorable for the burial of hydrophobic surface area (**Fig. 3**). Energetically, this  
45 transient interaction can be driven by intrinsic turn propensity and a small, favorable hydrogen bond  
46 formation energy. On the other hand, a random, non-turn ensemble of conformations poses several  
47 challenges for self-association; these conformations must shed a larger number of waters when associating,  
48 and pairs of conformations must be selected that allow for significant hydrophobic burial. From the  
49 perspective of chain entropy, this represents a significant feat that is partially overcome when both  
50 associating chains are in  $\beta$ -turn conformations. Thus, our calculations are consistent with a model where

1 transient  $\beta$ -turn stickers are separated by long stretches of random, non-turn spacers, and this may explain  
2 the propensity for turns in IDPs that undergo LLPS.

3  
4 In forming the  $\beta$ -turn  $\beta$ -turn complex, the assumption that macromolecular association is driven by the  
5 favorable energetics of hydrophobic burial has consequences that must be considered. The hydrophobic  
6 effect is known to be sensitive to temperature changes where increasingly cold conditions show  
7 progressively weaker potential to favor the nonspecific burial of hydrophobic groups from aqueous solution  
8 (Baldwin, 1986; Whitten et al., 2006). Because of this temperature dependence to the hydrophobic effect,  
9 the role of the  $\beta$ -turn in protein phase separation we have proposed is most likely applicable to heat induced  
10 phase separation, such as that described by the lower critical solution temperature (LCST) classification of  
11 phase separation (Quiroz and Chilkoti, 2015). While this doesn't exclude  $\beta$ -turns contribution, it is unlikely  
12 to apply or play a dominant role to the upper critical solution temperature (UCST) class where target  
13 proteins are miscible at higher temperatures and then de-mix when temperatures are lowered (Glatzel et al.,  
14 2011).

15  
16 Lastly, we find it interesting that the intrinsic potential for self-interactions, as estimated from sequence-  
17 calculated  $\nu$ , is on average lower (i.e., higher average  $\nu$ ) for sequences from proteins that adopt stable folded  
18 structures than it is for sequences from the PS IDP set; a result that is counterintuitive. This is shown in  
19 **Fig. 2B** and seems to emphasize the critical role of amino acid patterning for a folding reaction to occur  
20 and ultimately yield a globular structure stabilized by a network of intra-molecular interactions. Our  
21 compositional analysis of protein sequences specifically ignored patterning effects on structure.  
22 Nonetheless, two important implications about the character of IDRs and their role in LLPS emerge from  
23 these studies. First, IDRs that drive LLPS form a separate protein class from other IDRs and are identifiable  
24 from sequence by calculating the  $\beta$ -turn propensity and polymer scaling exponent,  $\nu$ , which inversely relates  
25 to the ability of a protein to interact with itself. Second, a simple mechanism has been identified where  
26 LLPS can be primed in disordered regions by transitions to the  $\beta$ -turn and its concomitant desolvation.  
27 Molecular simulations additionally point to significant hydrophobic burial in the course of  $\beta$ -turn  $\beta$ -turn  
28 interactions that could act to stabilize the shift to a protein-rich phase.

## 31 **Methods**

32  
33  **$R_h$  prediction.** The hydrodynamic dimensions of disordered protein ensembles depend strongly on  
34 sequence composition and  $R_h$  has been shown to be accurately predicted from the intrinsic chain bias for  
35 the polyproline II (PPII) conformation (Perez et al., 2014; Tomasso et al., 2016) and sequence estimates of  
36 the protein net charge (English et al., 2017, 2019). The equation to predict  $R_h$  is

$$38 R_h = 2.16\text{\AA} \cdot N^{(0.503 - 0.11 \cdot \ln(1 - f_{PPII}))} + 0.26 \cdot |Q_{net}| - 0.29 \cdot N^{0.5}, \quad (1)$$

39  
40 where  $N$  is the number of residues,  $f_{PPII}$  is the fractional number of residues in the PPII conformation, and  
41  $Q_{net}$  is the net charge (English et al., 2019).  $f_{PPII}$  is estimated from  $\sum P_{PPII,i}/N$ , where  $P_{PPII,i}$  is the experimental  
42 PPII propensity determined for amino acid type  $i$  in unfolded peptides (Elam et al., 2013) and the summation  
43 is over the protein sequence.  $Q_{net}$  is determined from the number of lysine and arginine residues minus the  
44 number of glutamic acid and aspartic acid.

45  
46 **Disorder prediction.** The presence of intrinsic disorder in proteins and protein regions can be predicted  
47 from sequence with good confidence (Meng et al., 2017). The GeneSilico MetaDisorder service (Kozlowski  
48 and Bujnicki, 2012) was utilized to calculate the disorder tendency at each position in a sequence from the  
49 consensus prediction of 13 primary methods. Residues with a disorder tendency  $>0.5$  are predicted to be  
50 disordered, while those with disorder tendency  $<0.5$  are predicted to be ordered. To minimize

1 misidentification, we selected ID regions as those with at least 20 contiguous residue positions having  
2 disorder tendency  $\geq 0.7$ .

3  
4 **Calculation of  $\beta$ -turn propensity.** The propensity to form  $\beta$ -turn structures was calculated by  $\sum scale_i/N$ ,  
5 where  $scale_i$  is the value for amino acid type  $i$  in the  $\beta$ -turn frequencies from Levitt (Levitt, 1978) obtained  
6 from ProtScale at the ExPASy Bioinformatics Resource Portal (Gasteiger et al., 2003). The summation is  
7 over the protein sequence containing  $N$  number of amino acids. Normalized  $\beta$ -turn frequencies for the  
8 common amino acids are reproduced in **Table S5** of the **Supplementary Information**.

9  
10 **Computer generation of disordered ensembles.** Structures of GVPGVG were generated by a random  
11 search of conformational space using a hard sphere collision model (Whitten et al., 2008). This model uses  
12 van der Waals atomic radii (Ramachandran et al., 1963; Iijima et al., 1987) as the only scoring function to  
13 eliminate grossly improbable conformations. The procedure to generate a random conformer starts with a  
14 unit peptide and all other atoms for a chain are determined by the rotational matrix (Jeffreys and Jeffreys,  
15 1950). Backbone atoms are generated from the dihedral angles  $\phi$ ,  $\psi$ , and  $\omega$  and the standard bond angles  
16 and bond lengths (Momany et al., 1975). Backbone dihedral angles are assigned randomly, using a random  
17 number generator based on Knuth's subtractive method (Knuth, 1981). ( $\phi$ ,  $\psi$ ) is restricted to the allowed  
18 Ramachandran regions (Mandel et al., 1977) to sample conformational space efficiently. For peptide bonds,  
19  $\omega$  had a Gaussian fluctuation of  $\pm 5\%$  about the *trans* form ( $180^\circ$ ) for nonproline residues. Proline sampled  
20 the *cis* form ( $0^\circ$ ) at a rate of 10% (MacArthur and Thornton, 1991). Of the two possible positions of the C $\beta$   
21 atom in nonglycine residues, the one corresponding to L-amino acids was used. The positions of all other  
22 side chain atoms were determined from random sampling of rotamer libraries (Lovell et al., 2000).  
23 Structures adopting the type II  $\beta$ -turn were identified as those with ( $\phi$ ,  $\psi$ ) angles of ( $-60^\circ \pm 15^\circ$ ,  $120^\circ \pm 15^\circ$ )  
24 and ( $80^\circ \pm 15^\circ$ ,  $0^\circ \pm 15^\circ$ ) for P3 and G4, respectively, while also containing a hydrogen bond connecting the  
25 carbonyl oxygen of V2 to the amide proton of V5.

26  
27 **CHASA analysis and molecular docking.** Computer generated structures, described above, were  
28 processed using the CHASA module (Fleming et al., 2005) of the LINUS software package (Srinivasan and  
29 Rose, 1995; Srinivasan et al., 2004). Two structures containing turns were docked using the  
30 GOLD/HERMES molecular docking software version 2020.1 (Jones et al., 1997). After hydrogen atoms  
31 were added, docking used the ChemPLP scoring function. The beta carbon on the third proline residue  
32 defined the binding site. Valine side chains were sampled using the built-in rotamer library, and all  
33 backbone torsions were held fixed in their original conformation. HERMES was used to calculate the buried  
34 hydrophobic accessible surface area upon formation of the complex.

## 35 36 37 **Acknowledgements**

38  
39 This work was supported by the National Institutes of Health under grants R15GM115603 (S.T.W.),  
40 R25GM102783 (South Texas Doctoral Bridge Program; N. M. J. Blake, B. O. Oyajobi, and S.T.W.),  
41 R35GM119755 (L.E.H.), and R01AI139479 (N.C.F.), as well as the National Science Foundation under  
42 grant 1818090 (N.C.F.). No nongovernmental sources were used to fund this project. The content is solely  
43 the responsibility of the authors and does not necessarily represent the official views of the NSF or NIH.

44  
45 **Competing interests:** The authors declare that no competing interests exist.

## 46 47 **References**

48  
49 Baldwin RL. 1986. Temperature dependence of the hydrophobic interaction in protein folding. *PNAS*  
50 **83**:8069–8072. doi:10.1073/pnas.83.21.8069



- 1 Brady JP, Farber PJ, Sekhar A, Lin Y-H, Huang R, Bah A, Nott TJ, Chan HS, Baldwin AJ, Forman-Kay  
2 JD, Kay LE. 2017. Structural and hydrodynamic properties of an intrinsically disordered region  
3 of a germ cell-specific protein on phase separation. *Proc Natl Acad Sci USA* **114**:E8194–E8203.  
4 doi:10.1073/pnas.1706197114
- 5 Chong PA, Forman-Kay JD. 2016. Liquid-liquid phase separation in cellular signaling systems. *Curr*  
6 *Opin Struct Biol* **41**:180–186. doi:10.1016/j.sbi.2016.08.001
- 7 Das RK, Pappu RV. 2013. Conformations of intrinsically disordered proteins are influenced by linear  
8 sequence distributions of oppositely charged residues. *PNAS* **110**:13392–13397.  
9 doi:10.1073/pnas.1304749110
- 10 Dunker AK, Obradovic Z, Romero P, Garner EC, Brown CJ. 2000. Intrinsic protein disorder in complete  
11 genomes. *Genome Inform Ser Workshop Genome Inform* **11**:161–171.
- 12 Elam WA, Schrank TP, Campagnolo AJ, Hilser VJ. 2013. Evolutionary conservation of the polyproline II  
13 conformation surrounding intrinsically disordered phosphorylation sites. *Protein Science* **22**:405–  
14 417. doi:10.1002/pro.2217
- 15 Elbaum-Garfinkle S, Kim Y, Szczepaniak K, Chen CC-H, Eckmann CR, Myong S, Brangwynne CP.  
16 2015. The disordered P granule protein LAF-1 drives phase separation into droplets with tunable  
17 viscosity and dynamics. *PNAS* **112**:7189–7194. doi:10.1073/pnas.1504822112
- 18 English LR, Tilton EC, Ricard BJ, Whitten ST. 2017. Intrinsic  $\alpha$  helix propensities compact  
19 hydrodynamic radii in intrinsically disordered proteins. *Proteins* **85**:296–311.  
20 doi:10.1002/prot.25222
- 21 English LR, Tischer A, Demeler AK, Demeler B, Whitten ST. 2018. Sequence Reversal Prevents Chain  
22 Collapse and Yields Heat-Sensitive Intrinsic Disorder. *Biophys J* **115**:328–340.  
23 doi:10.1016/j.bpj.2018.06.006
- 24 English LR, Voss SM, Tilton EC, Paiz EA, So S, Parra GL, Whitten ST. 2019. Impact of Heat on Coil  
25 Hydrodynamic Size Yields the Energetics of Denatured State Conformational Bias. *J Phys Chem*  
26 *B* **123**:10014–10024. doi:10.1021/acs.jpcc.9b09088
- 27 Fleming PJ, Fitzkee NC, Mezei M, Srinivasan R, Rose GD. 2005. A novel method reveals that solvent  
28 water favors polyproline II over beta-strand conformation in peptides and unfolded proteins:  
29 conditional hydrophobic accessible surface area (CHASA). *Protein Sci* **14**:111–118.  
30 doi:10.1110/ps.041047005
- 31 Flory PJ. 1969. Statistical mechanics of chain molecules. New York: Interscience Publishers.
- 32 Flory PJ. 1949. The Configuration of Real Polymer Chains. *J Chem Phys* **17**:303–310.  
33 doi:10.1063/1.1747243
- 34 Garzon-Rodriguez W, Sepulveda-Becerra M, Milton S, Glabe CG. 1997. Soluble Amyloid A $\beta$ -(1–40)  
35 Exists as a Stable Dimer at Low Concentrations. *J Biol Chem* **272**:21037–21044.  
36 doi:10.1074/jbc.272.34.21037
- 37 Gasteiger E, Gattiker A, Hoogland C, Ivanyi I, Appel RD, Bairoch A. 2003. ExPASy: The proteomics  
38 server for in-depth protein knowledge and analysis. *Nucleic Acids Res* **31**:3784–3788.  
39 doi:10.1093/nar/gkg563
- 40 Glatzel S, Laschewsky A, Lutz J-F. 2011. Well-Defined Uncharged Polymers with a Sharp UCST in  
41 Water and in Physiological Milieu. *Macromolecules* **44**:413–415. doi:10.1021/ma102677k
- 42 Harmon TS, Holehouse AS, Rosen MK, Pappu RV. 2017. Intrinsically disordered linkers determine the  
43 interplay between phase separation and gelation in multivalent proteins. *eLife* **6**:e30294.  
44 doi:10.7554/eLife.30294
- 45 Hofmann H, Soranno A, Borgia A, Gast K, Nettels D, Schuler B. 2012. Polymer scaling laws of unfolded  
46 and intrinsically disordered proteins quantified with single-molecule spectroscopy. *PNAS*  
47 **109**:16155–16160. doi:10.1073/pnas.1207719109
- 48 Iijima H, Dunbar JB, Marshall GR. 1987. Calibration of effective van der Waals atomic contact radii for  
49 proteins and peptides. *Proteins: Structure, Function, and Bioinformatics* **2**:330–339.  
50 doi:10.1002/prot.340020408
- 51 Jeffreys H, Jeffreys BS. 1950. Methods of mathematical physics. New York: Cambridge University Press.

- 1 Jones G, Willett P, Glen RC, Leach AR, Taylor R. 1997. Development and validation of a genetic  
2 algorithm for flexible docking<sup>11</sup>Edited by F. E. Cohen. *Journal of Molecular Biology* **267**:727–  
3 748. doi:10.1006/jmbi.1996.0897
- 4 Knuth DE. 1981. *The Art of Computer Programming, Volume 2: Seminumerical Algorithms*, 2nd ed.  
5 Reading, MA: Addison-Wesley.
- 6 Kohn JE, Millett IS, Jacob J, Zagrovic B, Dillon TM, Cingel N, Dothager RS, Seifert S, Thiagarajan P,  
7 Sosnick TR, Hasan MZ, Pande VS, Ruczinski I, Doniach S, Plaxco KW. 2004. Random-coil  
8 behavior and the dimensions of chemically unfolded proteins. *PNAS* **101**:12491–12496.  
9 doi:10.1073/pnas.0403643101
- 10 Kozlowski LP, Bujnicki JM. 2012. MetaDisorder: a meta-server for the prediction of intrinsic disorder in  
11 proteins. *BMC Bioinformatics* **13**:111. doi:10.1186/1471-2105-13-111
- 12 Krishnan VV, Lau EY, Yamada J, Denning DP, Patel SS, Colvin ME, Rexach MF. 2008. Intramolecular  
13 Cohesion of Coils Mediated by Phenylalanine–Glycine Motifs in the Natively Unfolded Domain  
14 of a Nucleoporin. *PLOS Computational Biology* **4**:e1000145. doi:10.1371/journal.pcbi.1000145
- 15 Langridge TD, Tarver MJ, Whitten ST. 2014. Temperature effects on the hydrodynamic radius of the  
16 intrinsically disordered N-terminal region of the p53 protein. *Proteins* **82**:668–678.  
17 doi:10.1002/prot.24449
- 18 Lee CF, Brangwynne CP, Gharakhani J, Hyman AA, Jülicher F. 2013. Spatial Organization of the Cell  
19 Cytoplasm by Position-Dependent Phase Separation. *Phys Rev Lett* **111**:088101.  
20 doi:10.1103/PhysRevLett.111.088101
- 21 Levitt M. 1978. Conformational preferences of amino acids in globular proteins. *Biochemistry* **17**:4277–  
22 4285. doi:10.1021/bi00613a026
- 23 Li P, Banjade S, Cheng H-C, Kim S, Chen B, Guo L, Llaguno M, Hollingsworth JV, King DS, Banani  
24 SF, Russo PS, Jiang Q-X, Nixon BT, Rosen MK. 2012. Phase transitions in the assembly of  
25 multivalent signalling proteins. *Nature* **483**:336–340. doi:10.1038/nature10879
- 26 Li Y, Zhao C, Luo F, Liu Z, Gui X, Luo Z, Zhang X, Li D, Liu C, Li X. 2018. Amyloid fibril structure of  
27  $\alpha$ -synuclein determined by cryo-electron microscopy. *Cell Res* **28**:897–903. doi:10.1038/s41422-  
28 018-0075-x
- 29 Lovell SC, Word JM, Richardson JS, Richardson DC. 2000. The penultimate rotamer library. *Proteins*  
30 **40**:389–408.
- 31 Lyons DF, Le V, Bidwell GL, Kramer WH, Lewis EA, Raucher D, Correia JJ. 2013. Structural and  
32 Hydrodynamic Analysis of a Novel Drug Delivery Vector: ELP[V5G3A2-150]. *Biophysical*  
33 *Journal* **104**:2009–2021. doi:10.1016/j.bpj.2013.03.040
- 34 Lyons DF, Le V, Kramer WH, Bidwell GL, Lewis EA, Raucher D, Correia JJ. 2014. Effect of Basic Cell-  
35 Penetrating Peptides on the Structural, Thermodynamic, and Hydrodynamic Properties of a Novel  
36 Drug Delivery Vector, ELP[V5G3A2-150]. *Biochemistry* **53**:1081–1091. doi:10.1021/bi400955w
- 37 MacArthur MW, Thornton JM. 1991. Influence of proline residues on protein conformation. *Journal of*  
38 *Molecular Biology* **218**:397–412. doi:10.1016/0022-2836(91)90721-H
- 39 Mandel N, Mandel G, Trus BL, Rosenberg J, Carlson G, Dickerson RE. 1977. Tuna cytochrome c at 2.0  
40 Å resolution. III. Coordinate optimization and comparison of structures. *J Biol Chem* **252**:4619–  
41 4636.
- 42 Marsh JA, Forman-Kay JD. 2010. Sequence determinants of compaction in intrinsically disordered  
43 proteins. *Biophys J* **98**:2383–2390. doi:10.1016/j.bpj.2010.02.006
- 44 Martin EW, Holehouse AS, Peran I, Farag M, Incicco JJ, Bremer A, Grace CR, Soranno A, Pappu RV,  
45 Mittag T. 2020. Valence and patterning of aromatic residues determine the phase behavior of  
46 prion-like domains. *Science* **367**:694–699. doi:10.1126/science.aaw8653
- 47 Meng F, Uversky VN, Kurgan L. 2017. Comprehensive review of methods for prediction of intrinsic  
48 disorder and its molecular functions. *Cell Mol Life Sci* **74**:3069–3090. doi:10.1007/s00018-017-  
49 2555-4

- 1 Mitrea DM, Cika JA, Stanley CB, Nourse A, Onuchic PL, Banerjee PR, Phillips AH, Park C-G, Deniz  
2 AA, Kriwacki RW. 2018. Self-interaction of NPM1 modulates multiple mechanisms of liquid-  
3 liquid phase separation. *Nat Commun* **9**:842. doi:10.1038/s41467-018-03255-3
- 4 Mitrea DM, Kriwacki RW. 2016. Phase separation in biology; functional organization of a higher order.  
5 *Cell Communication and Signaling* **14**:1. doi:10.1186/s12964-015-0125-7
- 6 Momany FA, McGuire RF, Burgess AW, Scheraga HA. 1975. Energy parameters in polypeptides. VII.  
7 Geometric parameters, partial atomic charges, nonbonded interactions, hydrogen bond  
8 interactions, and intrinsic torsional potentials for the naturally occurring amino acids. *J Phys*  
9 *Chem* **79**:2361–2381. doi:10.1021/j100589a006
- 10 Perez RB, Tischer A, Auton M, Whitten ST. 2014. Alanine and proline content modulate global  
11 sensitivity to discrete perturbations in disordered proteins. *Proteins* **82**:3373–3384.  
12 doi:10.1002/prot.24692
- 13 Quiroz FG, Chilkoti A. 2015. Sequence heuristics to encode phase behaviour in intrinsically disordered  
14 protein polymers. *Nature Materials* **14**:1164–1171. doi:10.1038/nmat4418
- 15 Ramachandran GN, Ramakrishnan C, Sasisekharan V. 1963. Stereochemistry of polypeptide chain  
16 configurations. *Journal of Molecular Biology* **7**:95–99. doi:10.1016/S0022-2836(63)80023-6
- 17 Reichheld SE, Muiznieks LD, Keeley FW, Sharpe S. 2017. Direct observation of structure and dynamics  
18 during phase separation of an elastomeric protein. *PNAS* **114**:E4408–E4415.  
19 doi:10.1073/pnas.1701877114
- 20 Snead WT, Zeno WF, Kago G, Perkins RW, Richter JB, Zhao C, Lafer EM, Stachowiak JC. 2019. BAR  
21 scaffolds drive membrane fission by crowding disordered domains. *J Cell Biol* **218**:664–682.  
22 doi:10.1083/jcb.201807119
- 23 Srinivasan R, Fleming PJ, Rose GD. 2004. Ab initio protein folding using LINUS. *Meth Enzymol*  
24 **383**:48–66. doi:10.1016/S0076-6879(04)83003-9
- 25 Srinivasan R, Rose GD. 1995. LINUS: a hierarchic procedure to predict the fold of a protein. *Proteins*  
26 **22**:81–99. doi:10.1002/prot.340220202
- 27 Tomasso ME, Tarver MJ, Devarajan D, Whitten ST. 2016. Hydrodynamic Radii of Intrinsically  
28 Disordered Proteins Determined from Experimental Polyproline II Propensities. *PLoS Comput*  
29 *Biol* **12**:e1004686. doi:10.1371/journal.pcbi.1004686
- 30 Uversky VN. 2002. Natively unfolded proteins: a point where biology waits for physics. *Protein Sci*  
31 **11**:739–756. doi:10.1110/ps.4210102
- 32 Uversky VN, Kuznetsova IM, Turoverov KK, Zaslavsky B. 2015. Intrinsically disordered proteins as  
33 crucial constituents of cellular aqueous two phase systems and coacervates. *FEBS Letters*  
34 **589**:15–22. doi:10.1016/j.febslet.2014.11.028
- 35 Vernon RM, Chong PA, Tsang B, Kim TH, Bah A, Farber P, Lin H, Forman-Kay JD. 2018. Pi-Pi  
36 contacts are an overlooked protein feature relevant to phase separation. *Elife* **7**.  
37 doi:10.7554/eLife.31486
- 38 Whitten ST, Kurtz AJ, Pometun MS, Wand AJ, Hilser VJ. 2006. Revealing the Nature of the Native State  
39 Ensemble through Cold Denaturation. *Biochemistry* **45**:10163–10174. doi:10.1021/bi060855+
- 40 Whitten ST, Yang H-W, Fox RO, Hilser VJ. 2008. Exploring the impact of polyproline II (PII)  
41 conformational bias on the binding of peptides to the SEM-5 SH3 domain. *Protein Sci* **17**:1200–  
42 1211. doi:10.1110/ps.033647.107
- 43 Wilkins DK, Grimshaw SB, Receveur V, Dobson CM, Jones JA, Smith LJ. 1999. Hydrodynamic Radii of  
44 Native and Denatured Proteins Measured by Pulse Field Gradient NMR Techniques.  
45 *Biochemistry* **38**:16424–16431. doi:10.1021/bi991765q
- 46 Wuttke R, Hofmann H, Nettels D, Borgia MB, Mittal J, Best RB, Schuler B. 2014. Temperature-  
47 dependent solvation modulates the dimensions of disordered proteins. *Proc Natl Acad Sci U S A*  
48 **111**:5213–5218. doi:10.1073/pnas.1313006111
- 49 Yang Y, Jones HB, Dao TP, Castañeda CA. 2019. Single Amino Acid Substitutions in Stickers, but Not  
50 Spacers, Substantially Alter UBQLN2 Phase Transitions and Dense Phase Material Properties. *J*  
51 *Phys Chem B* **123**:3618–3629. doi:10.1021/acs.jpccb.9b01024

- 1 Yarawsky AE, English LR, Whitten ST, Herr AB. 2017. The Proline/Glycine-Rich Region of the Biofilm  
2 Adhesion Protein Aap Forms an Extended Stalk that Resists Compaction. *J Mol Biol* **429**:261–  
3 279. doi:10.1016/j.jmb.2016.11.017
- 4 Zeno WF, Thatte AS, Wang L, Snead WT, Lafer EM, Stachowiak JC. 2019. Molecular Mechanisms of  
5 Membrane Curvature Sensing by a Disordered Protein. *J Am Chem Soc* **141**:10361–10371.  
6 doi:10.1021/jacs.9b03927
- 7 Zhang Y, Trabbic-Carlson K, Albertorio F, Chilkoti A, Cremer PS. 2006. Aqueous Two-Phase System  
8 Formation Kinetics for Elastin-Like Polypeptides of Varying Chain Length. *Biomacromolecules*  
9 **7**:2192–2199. doi:10.1021/bm060254y
- 10 Zhang Y, Zai-Rose V, Price CJ, Ezzell NA, Bidwell GL, Correia JJ, Fitzkee NC. 2018. Modeling the  
11 Early Stages of Phase Separation in Disordered Elastin-like Proteins. *Biophys J* **114**:1563–1578.  
12 doi:10.1016/j.bpj.2018.01.045  
13  
14

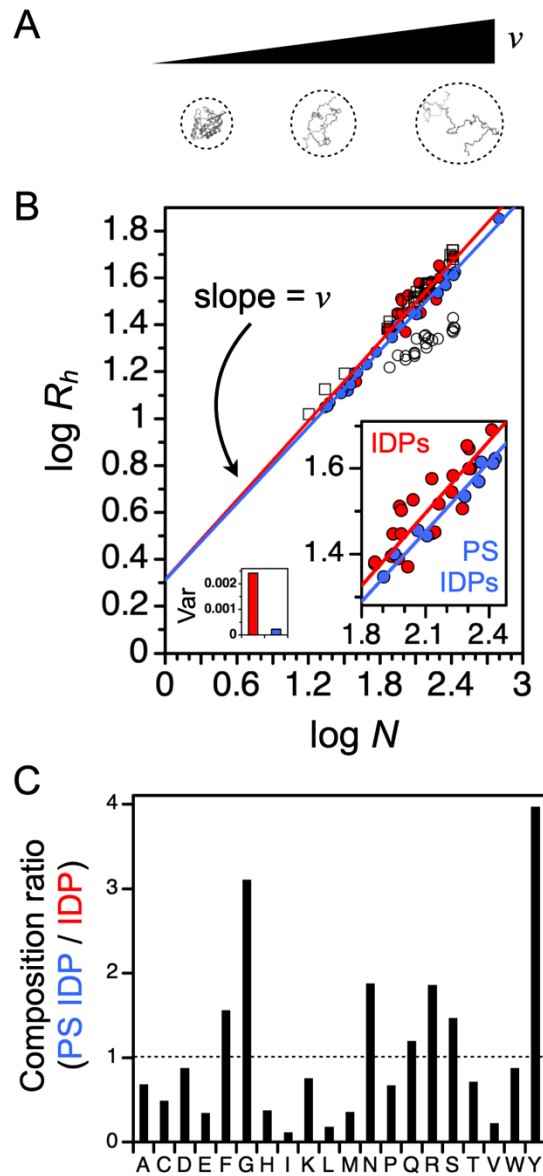

**Figure 1. Hydrodynamic dimensions of proteins.** **A)** Scaling exponent,  $\nu$ , from the power law relationship,  $R_h = R_o \cdot N^\nu$ , is proportional to hydrodynamic size. **B)** Mean hydrodynamic radius,  $R_h$  (Å), measured for folded proteins (open circles), chemically denatured proteins (open squares), and IDPs (red circles) compared to the sequence length,  $N$ . Blue circles are  $R_h$  that were predicted for the ID regions of proteins known to phase separate (PS IDPs). Right inset: duplicated data from the main plot that highlights the reduced  $\nu$  of the PS IDP set and the lower variance from its trend line, when compared to the IDP set. Left inset: variance, Var, of each set, IDP (red) and PS IDP (blue), calculated as  $1/n \cdot \sum (x - \bar{x})^2$ , where  $n$  is the number of proteins,  $x$  is  $\log R_h$ , and  $\bar{x}$  the trend line value determined from  $N$ . **C)** Composition ratio is the percent composition of each amino acid type, identified by its 1-letter code, for the PS IDP set divided by the IDP set.

1  
2  
3  
4  
5  
6  
7  
8  
9  
10  
11  
12  
13  
14  
15  
16  
17  
18  
19  
20  
21  
22  
23  
24  
25  
26  
27  
28  
29  
30  
31  
32  
33  
34  
35  
36  
37  
38  
39  
40  
41  
42  
43  
44  
45  
46  
47  
48  
49  
50

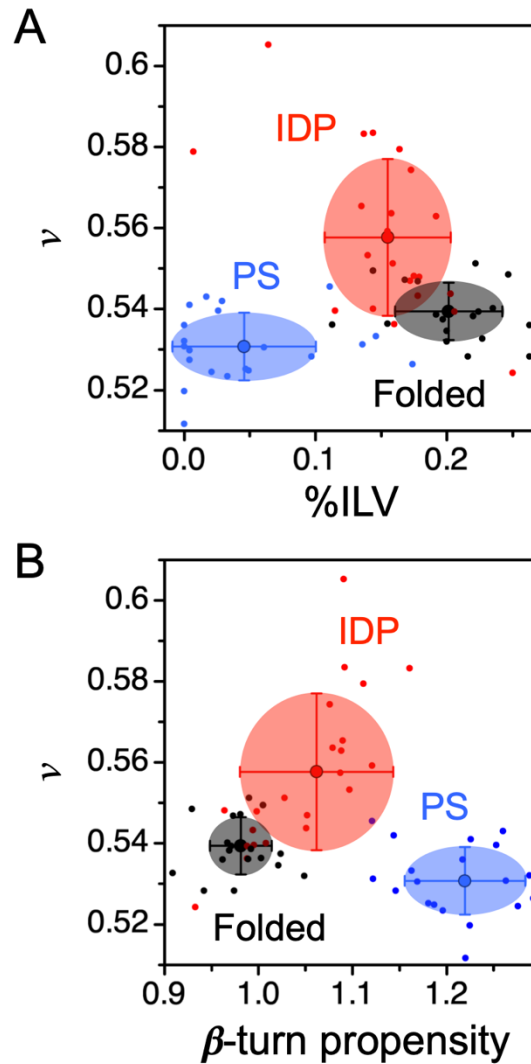

**Figure 2. Scaling exponent and compositional differences of IDPs, PS IDPs, and folded proteins.** Scaling exponent,  $\nu$ , was calculated for each protein from  $R_h$  and  $N$  as  $\nu = \log(R_h/R_o)/\log N$ , using 2.16 Å for  $R_o$  obtained from simulated conformational ensembles (Langridge et al., 2014).  $R_o$  determined from y-axis intercepts of the trend lines for IDPs and PS IDPs in Figure 1 yields 2.1 Å, showing good agreement with computer simulated results for  $R_o$ .  $R_h$  used to calculate  $\nu$  were experimental for IDPs, whereas PS IDPs and folded proteins used sequence predicted  $R_h$  by equation 1 in Methods. Large points and error bars show the averages and standard deviations for the IDP (red), PS IDP (blue), and folded protein (black) sets. The smaller points show individual proteins using the same coloring scheme. **A)** Comparison of  $\nu$  to the combined percent composition of the branched amino acids, I + L + V. **B)** Comparison of  $\nu$  to the  $\beta$ -turn propensity calculated from sequence.

1  
2  
3  
4  
5  
6  
7  
8  
9  
10  
11  
12  
13  
14  
15  
16  
17  
18  
19  
20  
21  
22  
23  
24  
25  
26  
27  
28  
29  
30  
31  
32  
33  
34  
35  
36  
37  
38  
39  
40  
41  
42  
43  
44  
45  
46  
47  
48  
49  
50  
51

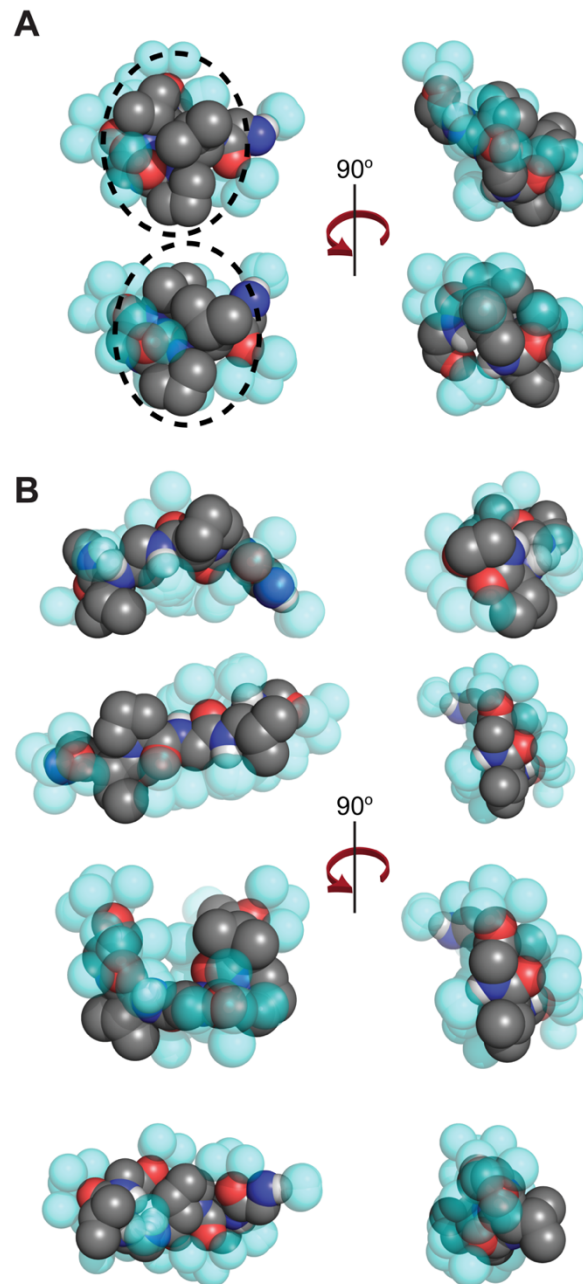

**Figure 3. Representative structures of turn and non-turn surface area.** Conformations are shown for the ELP repeat GVPGVG, including sterically allowed, CHASA-generated solvation waters (see text). **A**) Two representative turn conformation with a hydrogen bond between residues V2 and V5. Hydrophobic surface area from the V and P residues is clustered together and highlighted with a dashed black oval. The right-hand panels are generated by a 90° rotation about the indicated axis. **B**) ELP structures in four typical non-turn conformations. While the total hydrophobic surface area is greater than for the structures shown in panel A, it is less well-localized. CHASA solvation waters, associated with hydrogen bonding groups in the peptide backbone, are shown as semitransparent cyan spheres.

1  
2  
3  
4  
5  
6  
7  
8  
9  
10  
11  
12  
13  
14  
15  
16  
17  
18  
19  
20  
21  
22  
23  
24  
25  
26  
27  
28  
29  
30  
31  
32  
33  
34  
35  
36  
37  
38  
39  
40  
41  
42  
43  
44  
45  
46  
47

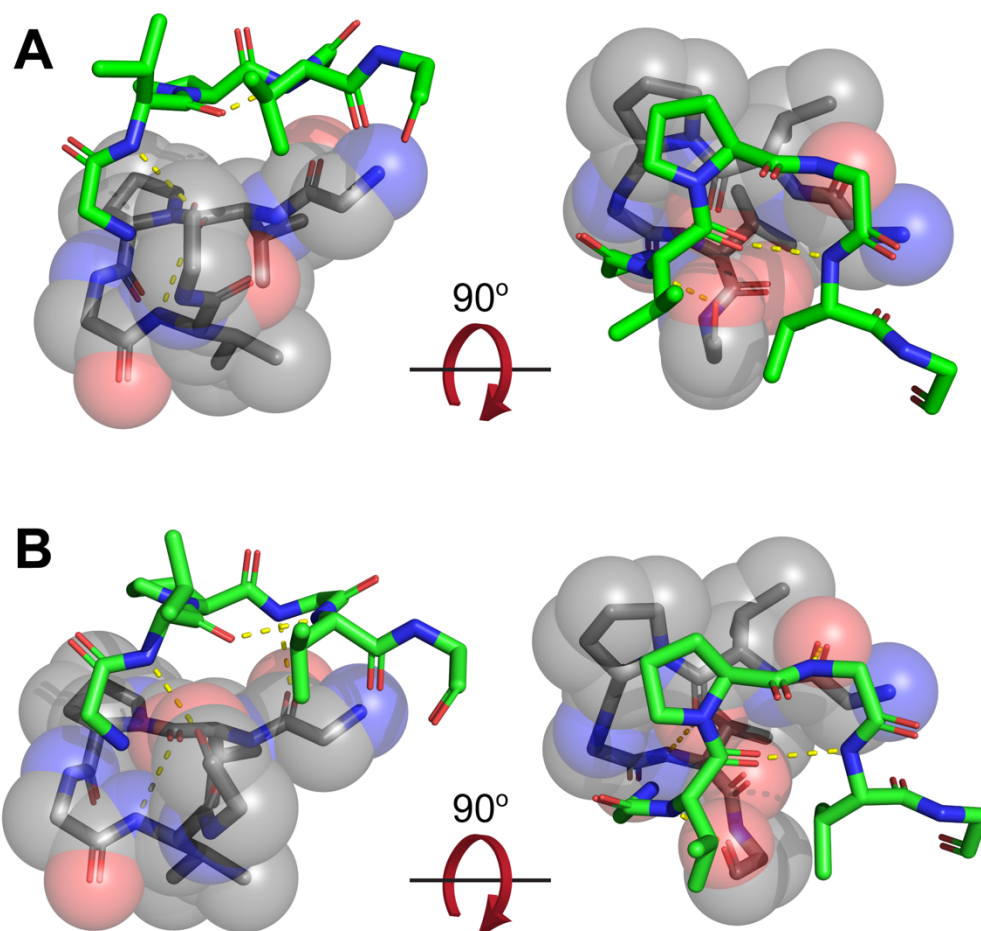

**Figure 4. Representative complex from a  $\beta$ -turn  $\beta$ -turn interaction.** GOLD-generated docking solution of two  $\beta$ -turns showing how turns might self-associate during LLPS, each turn burying approximately 110  $\text{\AA}^2$  of hydrophobic surface area. The two turns are colored grey (semi-transparent space filling representation) and green (stick representation). Hydrogen bonds are rendered as dashed lines.



1 **Tables**

2

3 **Table I. Structural properties of turn and non-turn ensembles.**

4

|                                                                                             | <b>Non-Turn Ensemble <sup>a</sup></b> | <b><math>\beta</math>-Turn Ensemble <sup>a</sup></b> |
|---------------------------------------------------------------------------------------------|---------------------------------------|------------------------------------------------------|
| Total ASA ( $\text{\AA}^2$ )                                                                | 738.3 $\pm$ 0.9                       | 670.3 $\pm$ 0.5                                      |
| Hydrophobic ASA ( $\text{\AA}^2$ )                                                          | 536.4 $\pm$ 0.8                       | 488.9 $\pm$ 0.5                                      |
| CHASA ( $\text{\AA}^2$ )                                                                    | 353.6 $\pm$ 0.6                       | 327.3 $\pm$ 0.6                                      |
| Hydrophobic ASA Lost assuming backbone hydration (Hydrophobic ASA – CHASA, $\text{\AA}^2$ ) | 182.8 $\pm$ 1.0                       | 161.6 $\pm$ 0.7                                      |
| Number of Backbone Hydration Waters (CHASA maximum is 55)                                   | 44.4 $\pm$ 0.1                        | 37.1 $\pm$ 0.1                                       |

5

6 <sup>a</sup> Uncertainties were calculated as the standard error of the mean.

7
